# Supplementary material for: Effectiveness and Community Acceptance of Extending Seasonal Malaria Chemoprevention to Children 5 to 14 Years of Age in Dangassa, Mali
Source: PubMed Central journal article supplement (PMC8832934; doi:10.4269/ajtmh.21-0046), 2021-11-15
Supplement: tpmd210046.SD1.pdf [file tpmd210046.SD1.pdf]

| STUDY<br>STUDYID                                                                                                                                                                                                   | SUBJECTID<br>USUBJID | SITE<br>SITEID                                                                                                                                                                                                          | Dangassa             |
|--------------------------------------------------------------------------------------------------------------------------------------------------------------------------------------------------------------------|----------------------|-------------------------------------------------------------------------------------------------------------------------------------------------------------------------------------------------------------------------|----------------------|
| <b>SMC adherence and compliance</b>                                                                                                                                                                                |                      |                                                                                                                                                                                                                         |                      |
| VISIT DATE <sup>1,2</sup> :  _ _ - _ _ - _ _  (DD-MMM-YYYY) VISIT 1 <input type="checkbox"/> 2 <input type="checkbox"/> 3 <input type="checkbox"/> 4 <input type="checkbox"/> 5 <input type="checkbox"/><br>VISDAT |                      |                                                                                                                                                                                                                         |                      |
| Personne interrogée : /____/ 1=Père 2=Mère 3=Tuteur 4=Autre (préciser) : _____                                                                                                                                     |                      |                                                                                                                                                                                                                         |                      |
| Age groups 1 <input type="checkbox"/> (3-59 month) 2 <input type="checkbox"/> (60-119 month)                                                                                                                       |                      |                                                                                                                                                                                                                         |                      |
| <b>Adhésion au traitement</b>                                                                                                                                                                                      |                      |                                                                                                                                                                                                                         |                      |
| Dans les 7 jours précédents l'enfant a-t-il été vu par l'agent de santé pour la campagne de la CPS ?                                                                                                               |                      |                                                                                                                                                                                                                         | ____  1=Oui<br>2=Non |
| Si non, quelle en était la principale raison ?                                                                                                                                                                     |                      | ____ <br>1=Voyage<br>2=Trop occupé/non disponible pour amener l'enfant<br>3=Oubli du jour de la campagne<br>4=Ne savait pas où aller<br>5=L'agent de santé n'a jamais visité la maison<br>6=Enfant malade 7=Autre _____ |                      |
| L'enfant a-t-il reçu une carte CPS ?                                                                                                                                                                               |                      | Oui <input type="checkbox"/> Non <input type="checkbox"/>                                                                                                                                                               |                      |
| Est-ce que la carte CPS de l'enfant est disponible ?                                                                                                                                                               |                      | Oui <input type="checkbox"/> Non <input type="checkbox"/>                                                                                                                                                               |                      |
| Si non, donner les raisons ?                                                                                                                                                                                       |                      | ____  1=Perdu<br>2=Parent/tuteur absent<br>3=Carte non remise<br>4=Autres : _____                                                                                                                                       |                      |
| Vérifiez sur la carte CPS si l'enfant a reçu SP+AQ pour ce passage                                                                                                                                                 |                      | ____  1=Reçu, 2=Non reçu                                                                                                                                                                                                |                      |
| Si carte non vue, l'enfant a-t-il quand même reçu la dose SP+AQ selon les parents ?                                                                                                                                |                      | <input type="checkbox"/> Reçu <input type="checkbox"/> Non reçu                                                                                                                                                         |                      |
| Si SP+AQ non reçu sur la carte, pourquoi ?<br><i>Donner la principale raison.</i>                                                                                                                                  |                      | ____ <br>1= Enfant malade<br>2=Allergie au médicament<br>3= L'agent n'a pas noté sur la carte<br>4=Autre _____                                                                                                          |                      |
| La dose de J1 a-t-elle été vomie /rejetée ?                                                                                                                                                                        |                      | Oui <input type="checkbox"/> Non <input type="checkbox"/>                                                                                                                                                               |                      |
| Si la dose a été vomie /rejetée une dose de remplacement a-t-elle été donnée ?                                                                                                                                     |                      | Oui <input type="checkbox"/> Non <input type="checkbox"/>                                                                                                                                                               |                      |
| Si une dose de remplacement du 1 <sup>er</sup> jour a été donnée, cette dose a-t-elle été vomie/rejetée ?                                                                                                          |                      | Oui <input type="checkbox"/> Non <input type="checkbox"/>                                                                                                                                                               |                      |
| Est-ce que l'enfant a pris la dose de médicament du 2 <sup>ème</sup> jour au cours de ce passage ?                                                                                                                 |                      | Oui <input type="checkbox"/> Non <input type="checkbox"/>                                                                                                                                                               |                      |
| Si médicament du 2 <sup>ème</sup> jour n'a pas été pris, pourquoi ?                                                                                                                                                |                      | ____ <br>1=Oubli de donner<br>2=Dose non retrouvée                                                                                                                                                                      |                      |

<sup>1</sup> Visit date pertains to all information collected on day of enrolment / visit 1

<sup>2</sup> All dates to be recorded as DD-MMM-YYYY

| STUDY<br>STUDYID                                                                                                                                                                            | SUBJECTID<br>USUBJID | SITE<br>SITEID                                                                                                                                                                                     | Dangassa |
|---------------------------------------------------------------------------------------------------------------------------------------------------------------------------------------------|----------------------|----------------------------------------------------------------------------------------------------------------------------------------------------------------------------------------------------|----------|
| <i>Donner la principale raison.</i>                                                                                                                                                         |                      | 3=Dose donnée à un autre enfant<br>4=Veut garder pour une maladie future<br>5=Autre _____                                                                                                          |          |
| La dose du 2 <sup>ème</sup> jour a-t-elle été vomie/rejetée ?                                                                                                                               |                      | Oui <input type="checkbox"/> Non <input type="checkbox"/>                                                                                                                                          |          |
| Une dose de remplacement du 2 <sup>ème</sup> jour a été donnée ?                                                                                                                            |                      | Oui <input type="checkbox"/> Non <input type="checkbox"/>                                                                                                                                          |          |
| Est-ce l'enfant a reçu la dose du 3 <sup>ème</sup> jour des médicaments de la CPS au cours de ce passage ?                                                                                  |                      | Oui <input type="checkbox"/> Non <input type="checkbox"/>                                                                                                                                          |          |
| Si le médicament du 3 <sup>ème</sup> jour n'a pas été pris, pourquoi ?                                                                                                                      |                      | ____ <br>1=Oubli de donner<br>2=Dose non retrouvée<br>3=Dose donnée à un autre enfant<br>4=Veut garder pour une maladie future<br>5=Autre _____                                                    |          |
| La dose du 3 <sup>ème</sup> jour a-t-elle été vomie/rejetée ?                                                                                                                               |                      | Oui <input type="checkbox"/> Non <input type="checkbox"/>                                                                                                                                          |          |
| Si une dose de remplacement du 3 <sup>ème</sup> jour a été donnée, cette dose a-t-elle été vomie/rejetée ?                                                                                  |                      | Oui <input type="checkbox"/> Non <input type="checkbox"/>                                                                                                                                          |          |
| Est-ce que je peux voir le reste des médicaments que vous deviez donner à l'enfant ?                                                                                                        |                      | ____ <br>1=Reste 2 doses<br>2=Reste 1 dose<br>3=Emballage vu et vide<br>4=Ni dose ni emballage disponible                                                                                          |          |
| <b>Effets secondaires et conduite à tenir</b>                                                                                                                                               |                      |                                                                                                                                                                                                    |          |
| Est-ce que l'enfant a fait de la fièvre dans les 2 derniers jours avant de voir l'agent de santé au cours de la campagne de la CPS ?                                                        |                      | Oui <input type="checkbox"/> Non <input type="checkbox"/>                                                                                                                                          |          |
| Si fièvre, est-ce que l'agent de santé a pris du sang de l'enfant au doigt ou au talon à l'aide                                                                                             |                      | Oui <input type="checkbox"/> Non <input type="checkbox"/>                                                                                                                                          |          |
| Quel a été le résultat du test ?                                                                                                                                                            |                      | <input type="checkbox"/> positif <input type="checkbox"/> négatif <input type="checkbox"/> ne sait pas                                                                                             |          |
| Est-ce que l'agent de santé a donné des médicaments pour la maladie de l'enfant ?                                                                                                           |                      | Oui <input type="checkbox"/> Non <input type="checkbox"/>                                                                                                                                          |          |
| Quels médicaments l'agent de santé a donné à l'enfant<br><i>Montrer des échantillons de ces médicaments</i>                                                                                 |                      | ____ <br>1=SP-AQ (Médicament de la CPS)<br>2=AL (Artéméther – Luméfantrine)<br>3=Quinine<br>4=Autre _____                                                                                          |          |
| Est-ce que l'enfant a eu les symptômes suivants depuis le 1er jour d'administration des médicaments de la CPS?<br><br><i>Cocher dans toutes les cases correspondant aux symptômes cités</i> |                      | 1=Diarrhées /____/<br>2=Vomissements /____/<br>3=Fatigue/ faiblesse /____/<br>4=Douleur abdominale /____/<br>5=Démangeaison /____/<br>6= Ictère/jaunisse /____/<br>7=Autre _____<br>8=Aucun /____/ |          |

| STUDY<br>STUDYID                                                                                       | SUBJECTID<br>USUBJID | SITE<br>SITEID                                                                                                                             | Dangassa |
|--------------------------------------------------------------------------------------------------------|----------------------|--------------------------------------------------------------------------------------------------------------------------------------------|----------|
| Pensez-vous que ces symptômes étaient liés à la prise des médicaments de la CPS ?                      |                      | Oui <input type="checkbox"/> Non <input type="checkbox"/>                                                                                  |          |
| Avez-vous fait consulter l'enfant quelque part pour ces symptômes ?                                    |                      | Oui <input type="checkbox"/> Non <input type="checkbox"/>                                                                                  |          |
| Si oui, combien de temps avez-vous pris pour aller consulter ?                                         |                      | /_____/                                                                                                                                    |          |
|                                                                                                        |                      | 1=le même jour                                                                                                                             |          |
|                                                                                                        |                      | 2=le jour suivant                                                                                                                          |          |
|                                                                                                        |                      | 3=plus de deux jours                                                                                                                       |          |
| Si non, pourquoi ?                                                                                     |                      | Ca va passer /_____/                                                                                                                       |          |
|                                                                                                        |                      | Manque de moyen /_____/                                                                                                                    |          |
|                                                                                                        |                      | Autres _____                                                                                                                               |          |
|                                                                                                        |                      | Rien /_____/                                                                                                                               |          |
| L'enfant a-t-il dormi sous une moustiquaire imprégnée d'insecticide la nuit dernière?                  |                      | Oui <input type="checkbox"/> Non <input type="checkbox"/>                                                                                  |          |
| <b>Opinion sur la CPS</b>                                                                              |                      |                                                                                                                                            |          |
| Pensez-vous que la CPS est :                                                                           |                      | <input type="checkbox"/> Très bonne <input type="checkbox"/> Bonne <input type="checkbox"/> Mauvaise <input type="checkbox"/> Sans opinion |          |
| Pensez-vous que la CPS devrait continuer dans le futur ?                                               |                      | <input type="checkbox"/> Oui <input type="checkbox"/> Non <input type="checkbox"/> Ne sait pas                                             |          |
| Pensez-vous qu'il y a des choses à améliorer pour que la CPS soit encore plus efficace dans le futur ? |                      | _____<br>_____                                                                                                                             |          |
| Pensez-vous que les agents distributeurs font correctement leur travail ?                              |                      | _____<br>_____                                                                                                                             |          |
| Avez-vous des commentaires ?                                                                           |                      |                                                                                                                                            |          |
